# Supplementary material for: TLR9-mediated dendritic cell activation uncovers mammalian ganglioside species with specific ceramide backbones that activate invariant natural killer T cells
Source: PLoS Biol. 2019 Mar 1;17(3):e3000169. doi: 10.1371/journal.pbio.3000169 (PMC6420026; doi:10.1371/journal.pbio.3000169)
Supplement: S2 Table — (XLSX) [file pbio.3000169.s023.xlsx]

## Sheet: Feuil1
	Genes	Forward primer	Reverse primer
	Gapdh	5’-TGCCCAGAACATCATCCCTG-3’	5’-TCAGATCCACGACGGACACA-3’
	Asah1	5’-CGTGGACAGAAGATTGCAGAA-3’	5’-TGGTGCCTTTTGAGCCAATAAT-3’
	Naaa	5’-GACTCCGCCTCTCTTCAACG-3’	5’-ACCATCCCGAGTACCCACTG-3’
	Cers1	5’-CCACCACACACATCTTTCGG-3’	5’-GGAGCAGGTAAGCGCAGTAG-3’
	Cers2	5’-ATGCTCCAGACCTTGTATGACT-3’	5’-CTGAGGCTTTGGCATAGACAC-3’
	Cers3	5’-ATGGGCTTGTCTTCGTGAAAG-3’	5’-TTGCTTGTGGAATGCTTGAAAAA-3’
	Cers4	5’-TACCCACATCAGACCCTGAAT-3’	5’-TGAAGTCCTTGCGTTTGACATC-3’
	Cers5	5’-CGGGGAAAGGTGTCTAAGGAT-3’	5’-GTTCATGCAGTTGGCACCATT-3’
	Cers6	5’-GATTCATAGCCAAACCATGTGCC-3’	5’-AATGCTCCGAACATCCCAGTC-3’
